# Supplementary material for: Functionalization of Polylactide with Multiple Tetraphenyethane Inifer Groups to Form PLA Block Copolymers with Vinyl Monomers
Source: MDPI journal article supplement (doi:10.3390/ijms24010019), 2022-12-20
Supplement: s1 [file s1]

## Functionalization of Polylactide with Multiple Tetraphenylethane Inifer Groups to Form PLA Block Copolymers with Vinyl Monomers

Mateusz Grabowski, Bartłomiej Kost, Agnieszka Bodzioch, Melania Bednarek\*

Centre of Molecular and Macromolecular Studies, Polish Academy of Sciences, Sienkiewicza 112, 90-363 Lodz, Poland

### 1. Determination of molecular weights of synthesized PLA diols

Molecular weights of PLA polymers were calculated by the comparison of the intensities of signals (in DMSO-d<sub>6</sub>) corresponding to  $\text{-CH(CH}_3\text{)-OH}$  end groups at 4.20 ppm and corresponding to  $\text{-CH(CH}_3\text{)-}$  groups from PLA backbone at 5.12 and 5.20 ppm (Figure 1 in the main text).

### 2. Analysis of PLA-based polyurethane (PLA-PU)

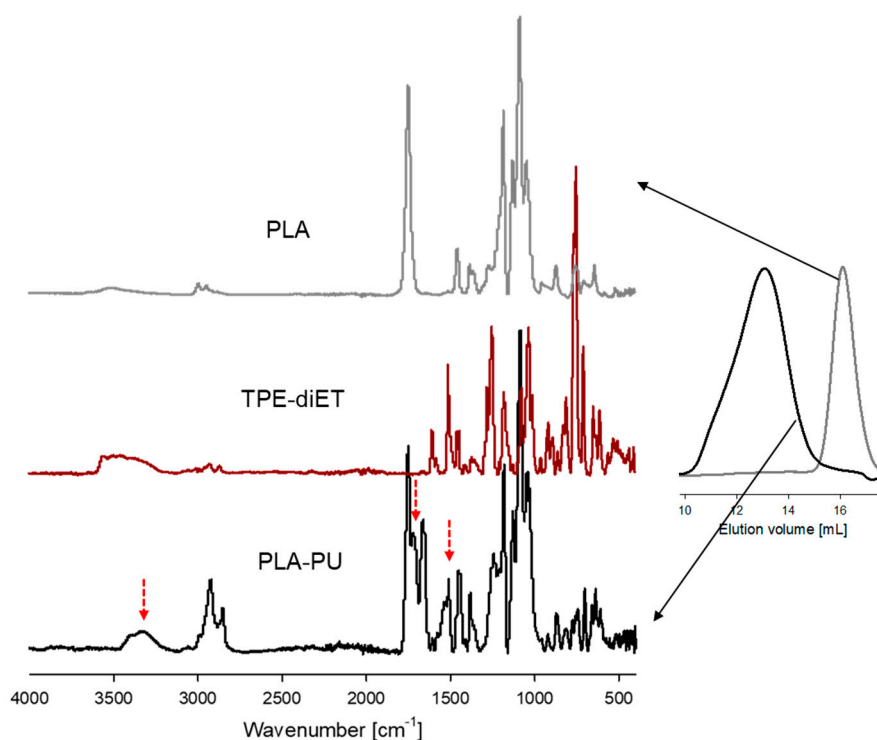

**Figure S1.** FTIR spectra of PLA-PU and the initial components (red arrows indicate newly formed urethane linkages) and SEC curves for starting PLA and PLA-PU (DMF as an eluent).

### 3. Calculation of the relative decomposition rate of TPE groups present in PLA-PU polymer on the basis of ESR spectra

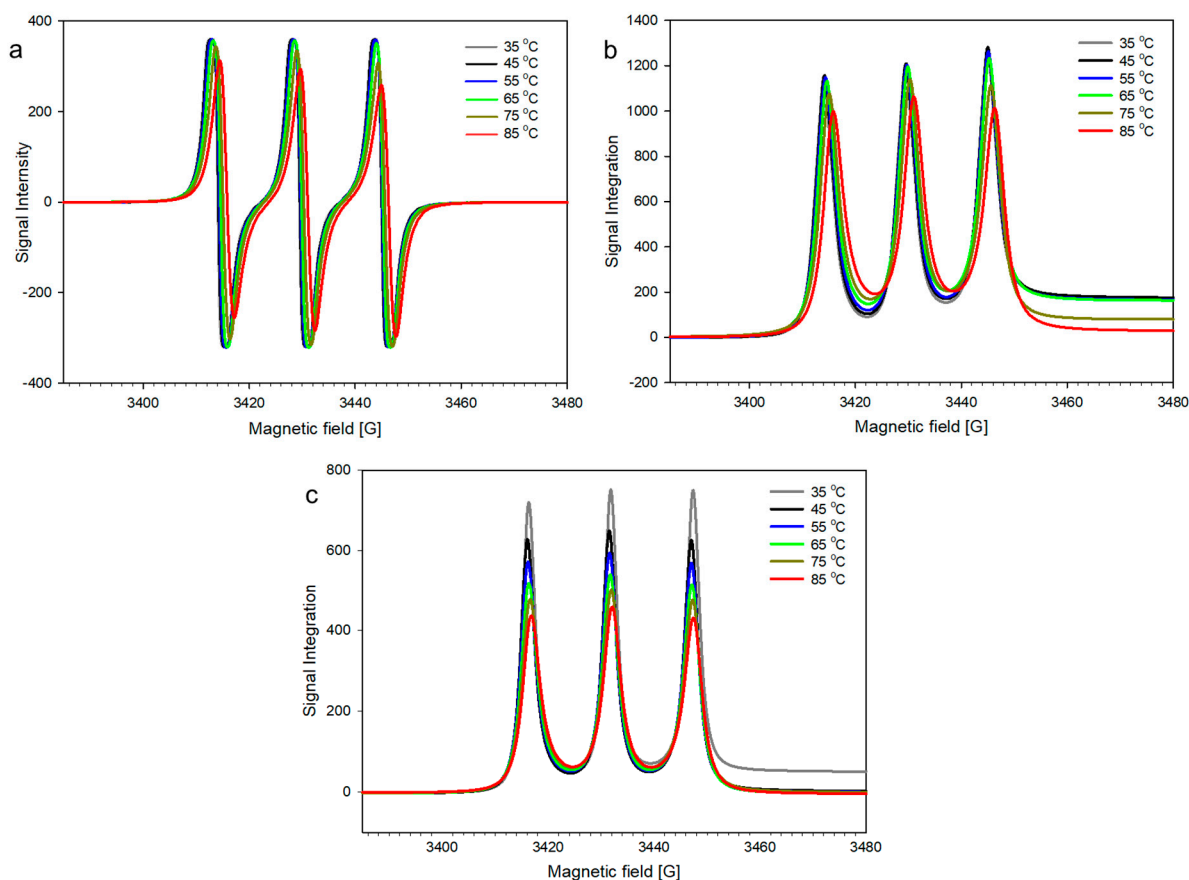

**Figure S2.** a) ESR spectra of TEMPO, b) normalized spectra for plots in Fig. S2a, c) normalized spectra for PLA-PU (+TEMPO) shown in Fig. 2a in the main text.

The concentration of the formed radicals was measured indirectly, by the measurement the concertation of TEMPO radicals which remained after catching ...-TPE/2•. To calculate TPE decomposition ratio, the formula was applied:

$$Y = x_1(I_1 - I_2)/2x_2I_1 \quad (S1a)$$

$x_1$  – quantity of TEMPO (mols)

$x_2$  - quantity of TPE groups in PLA-PU (mols)

$I_1$  – integral area from the normalized absorption curve for TEMPO

$I_2$  – integral area from the normalized absorption curve for PLA-PU with TEMPO

Two solutions were prepared and ESR spectra for them were recorded at 35, 45, 55, 65, 75 °C:

1. 0.8 mg of TEMPO in 1 mL of DMF, i.e.  $5.12 \times 10^{-3}$  mmol

2. 80 mg of PLA-PU + 0.8 mg of TEMPO in 1 mL of DMF, i.e.  $46 \times 10^{-3}$  mmol +  $5.12 \times 10^{-3}$  mmol

After inserting the values into the equation (S1a):

$$Y = 0.55(I_1 - I_2)/I_1 \quad (\text{S1b})$$

ESR spectra presented in Fig. 2a for PU-PLA (with TEMPO) and Fig. S2a for TEMPO were transformed into normalized spectra presented in Fig. S2b and S2c using Origin Software (Integration of signals from the original ESR).

The  $I_1$  and  $I_2$  values were found from normalized spectra and were put into the equation 1b to find  $Y$  values at different temperatures. The dependence  $Y = f(T)$  is shown in Fig. 2b in the main text.

#### 4. FTIR analyses of PLA/PST and PLA/PAN copolymers

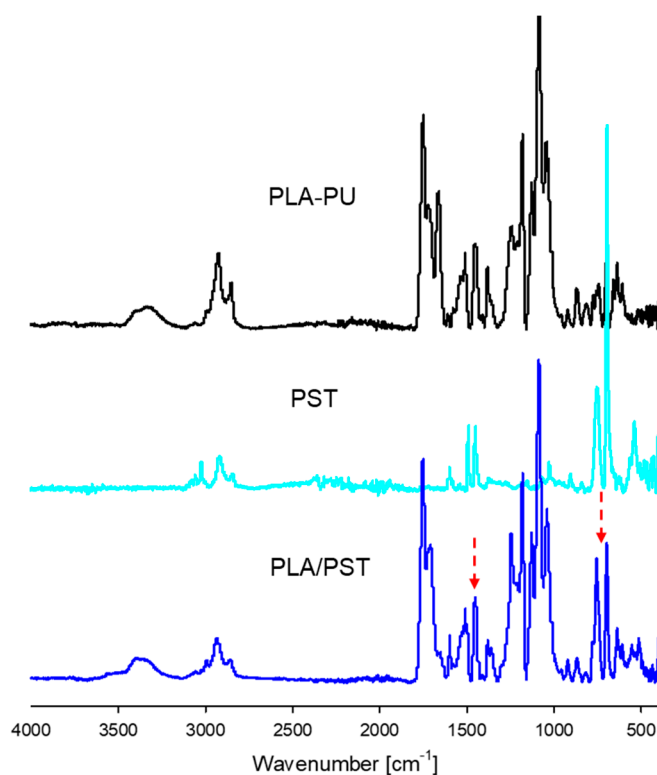

**Figure S3.** FTIR spectra of PLA-PU, additionally synthesized PST, and PLA/PST copolymer. Red arrows indicate the signals corresponding to aromatic ring ( $698 \text{ cm}^{-1}$  and  $1492 \text{ cm}^{-1}$ ) for PST [38].

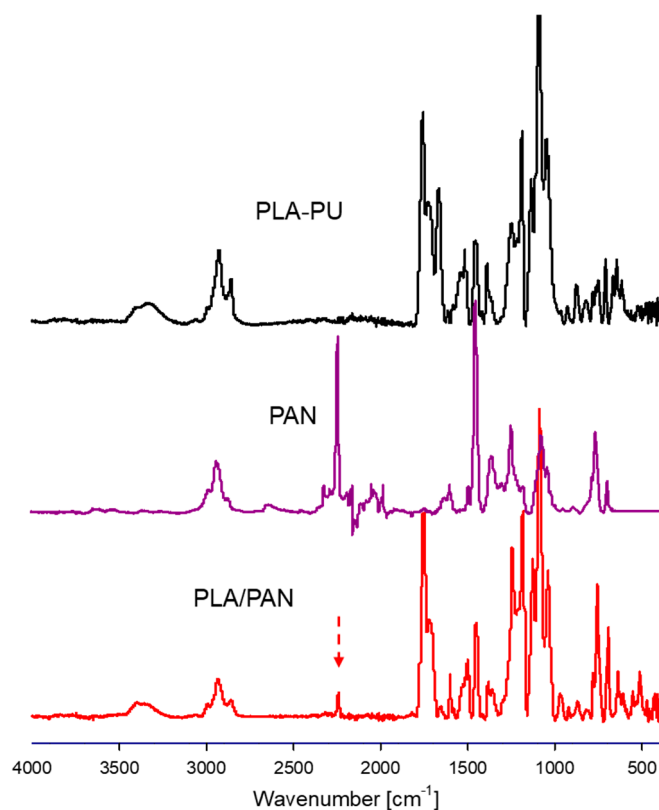

**Figure S4.** FTIR spectra of PLA-PU, additionally synthesized PAN, and PLA/PAN copolymer. Red arrows indicate the signal corresponding to nitrile group in PAN (2240 cm<sup>-1</sup>) [39].

Homopolymers - PST and PAN for comparison in FTIR analyses were obtained via radical polymerizations of ST and AN correspondingly, initiated with AIBN.

## 5. The stability of PLA- based PU during heating

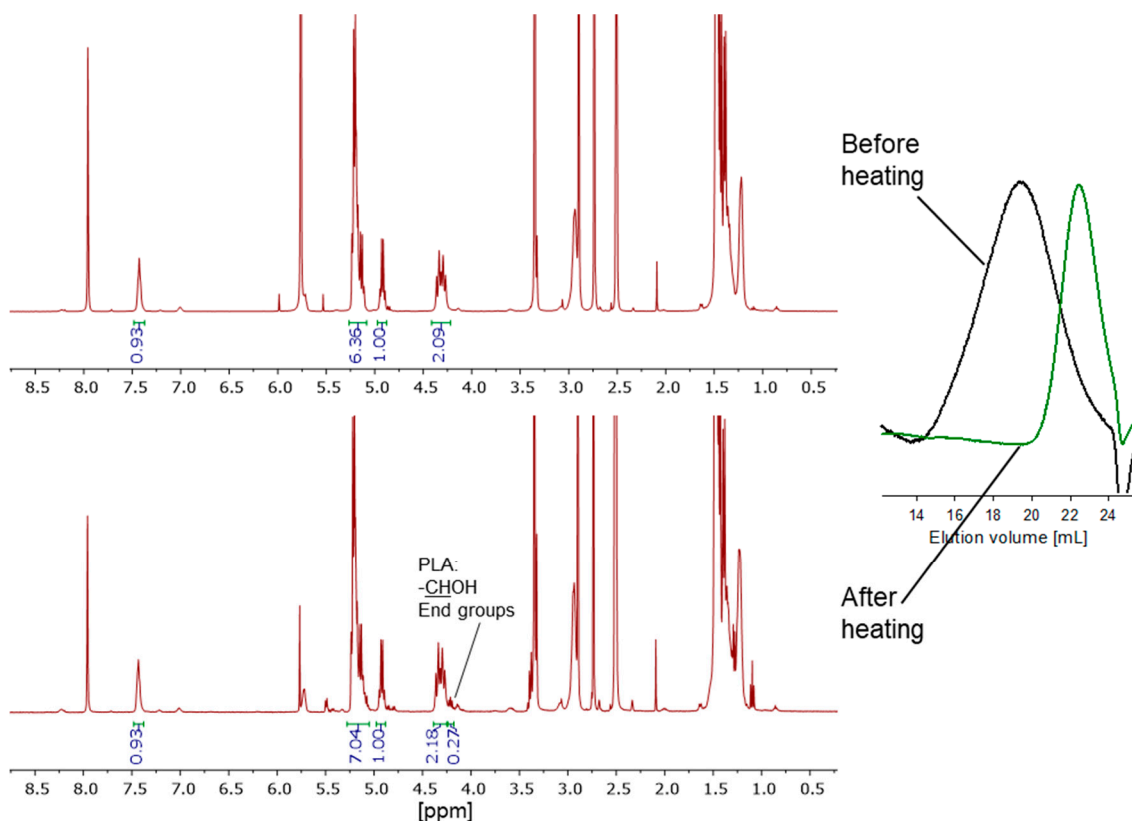

**Figure S5 .**  $^1\text{H}$  NMR spectra of PLA-PU prepared without TPE-diET before and after heating in DMF at 85 °C for 24h and SEC curves for PU before and after heating (DMF as an eluent).

## 6. Diffusion coefficients of PLA-PU/PVM copolymers and corresponding homopolymers on the basis of DOSY NMR measurements

**Table S1.** The diffusion coefficients for groups in PLA/PVM copolymers and homopolymers corresponding to particular signals in  $^1\text{H}$  NMR spectra shown in Fig. 5 and Fig. 6 in the main text.

| PLA/PAN      |                                                                     | PLA/PST      |                                                                     |
|--------------|---------------------------------------------------------------------|--------------|---------------------------------------------------------------------|
| Signal [ppm] | Diffusion coefficient<br>$\times 10^7$ , [ $\text{cm}^2/\text{s}$ ] | Signal [ppm] | Diffusion coefficient<br>$\times 10^7$ , [ $\text{cm}^2/\text{s}$ ] |
| PLA-PU       |                                                                     | PLA-PU       |                                                                     |
| 7.33-7.24    | 1.27                                                                | 7.33-7.24    | 1.41                                                                |
| 7.24-7.16    | 1.29                                                                | 7.24-7.16    | 1.42                                                                |

|                   |      |                  |      |
|-------------------|------|------------------|------|
| 7.06-6.96         | 1.27 | 7.06-6.96        | 1.49 |
| 6.68-6.57         | 1.28 | 6.68-6.57        | 1.41 |
| 5.22-5.13         | 1.26 | 5.22-5.13        | 1.46 |
| 4.93-4.87         | 1.26 | 4.93-4.87        | 1.41 |
| 4.22-4.16         | 1.27 | 4.22-4.16        | 1.43 |
| 4.07-3.98         | 1.26 | 4.07-3.98        | 1.46 |
| 1.56-1.34         | 1.26 | 2.93-2.89        | 1.45 |
|                   |      | 1.56-1.34        | 1.40 |
| PAN               |      | PST              |      |
| 3.16-3.09         | 0.78 | 7.25-6.88        | 7.44 |
| 2.14-2.06         | 0.78 | 6.88-6.31        | 7.47 |
|                   |      | 1.90-1.27        | 7.44 |
| PLA-PU/PAN copol. |      | PLA-PU/PST copol |      |
| 7.76-7.02         | 2.80 | 7.75-7.62        | 3.25 |
| 6.89              | 2.83 | 7.56-7.41        | 3.20 |
| 6.64              | 2.82 | 7.23-6.30        | 3.21 |
| 5.22-5.13         | 2.81 | 5.22-5.13        | 3.21 |
| 4.93-4.87         | 2.78 | 4.93-4.87        | 3.18 |
| 4.38-4.16         | 2.80 | 4.22-4.16        | 3.27 |
| 3.22-3.05         | 2.85 | 2.95-2.89        | 3.25 |
| 2.20-1.90         | 2.86 | 1.56-1.34        | 3.26 |
| 1.51-1.41         | 2.76 | 1.21-1.19        | 3.25 |
